# Supplementary material
Source: publisher site journal article supplement (https://study.sagepub.com/system/files/appendix_a.pdf)
Supplement: Supplementary file 1 [file appendix_a.pdf]

## APPENDIX A: THE CODEBOOK

This codebook contains information for each of the variables in your DEMO.SAV and EXER.SAV files.

### SUBSAMPLE 1: DEMO.SAV

As noted in Chapter 3, DEMO.SAV is used in the demonstrations in the body of the chapters. This subsample contains 1,500 cases and 43 variables drawn from the 2016 General Social Survey (GSS).

#### ABANY

|                     |             | Value                                  | Count | Percent |
|---------------------|-------------|----------------------------------------|-------|---------|
| Standard Attributes | Position    | 1                                      |       |         |
|                     | Label       | Abortion if woman wants for any reason |       |         |
|                     | Type        | Numeric                                |       |         |
|                     | Format      | F1                                     |       |         |
|                     | Measurement | Nominal                                |       |         |
|                     | Role        | Input                                  |       |         |
| Valid Values        | 1           | YES                                    | 441   | 29.4%   |
|                     | 2           | NO                                     | 502   | 33.5%   |
| Missing Values      | 0           | IAP                                    | 516   | 34.4%   |
|                     | 8           | DK                                     | 25    | 1.7%    |
|                     | 9           | NA                                     | 16    | 1.1%    |

#### ABDEFECT

|                     |             | Value                           | Count | Percent |
|---------------------|-------------|---------------------------------|-------|---------|
| Standard Attributes | Position    | 2                               |       |         |
|                     | Label       | Strong chance of serious defect |       |         |
|                     | Type        | Numeric                         |       |         |
|                     | Format      | F1                              |       |         |
|                     | Measurement | Nominal                         |       |         |
|                     | Role        | Input                           |       |         |
| Valid Values        | 1           | YES                             | 710   | 47.3%   |
|                     | 2           | NO                              | 236   | 15.7%   |
| Missing Values      | 0           | IAP                             | 516   | 34.4%   |
|                     | 8           | DK                              | 23    | 1.5%    |
|                     | 9           | NA                              | 15    | 1.0%    |

**ABHLTH**

|                     |             | Value                               | Count | Percent |
|---------------------|-------------|-------------------------------------|-------|---------|
| Standard Attributes | Position    | 3                                   |       |         |
|                     | Label       | Woman's health seriously endangered |       |         |
|                     | Type        | Numeric                             |       |         |
|                     | Format      | F1                                  |       |         |
|                     | Measurement | Nominal                             |       |         |
|                     | Role        | Input                               |       |         |
| Valid Values        | 1           | YES                                 | 834   | 55.6%   |
|                     | 2           | NO                                  | 110   | 7.3%    |
| Missing Values      | 0           | IAP                                 | 516   | 34.4%   |
|                     | 8           | DK                                  | 27    | 1.8%    |
|                     | 9           | NA                                  | 13    | 0.9%    |

**ABNOMORE**

|                     |             | Value                          | Count | Percent |
|---------------------|-------------|--------------------------------|-------|---------|
| Standard Attributes | Position    | 4                              |       |         |
|                     | Label       | Married—wants no more children |       |         |
|                     | Type        | Numeric                        |       |         |
|                     | Format      | F1                             |       |         |
|                     | Measurement | Nominal                        |       |         |
|                     | Role        | Input                          |       |         |
| Valid Values        | 1           | YES                            | 459   | 30.6%   |
|                     | 2           | NO                             | 493   | 32.9%   |
| Missing Values      | 0           | IAP                            | 516   | 34.4%   |
|                     | 8           | DK                             | 21    | 1.4%    |
|                     | 9           | NA                             | 11    | 0.7%    |

**ABPOOR**

|                     |             | Value                                 | Count | Percent |
|---------------------|-------------|---------------------------------------|-------|---------|
| Standard Attributes | Position    | 5                                     |       |         |
|                     | Label       | Low income—can't afford more children |       |         |
|                     | Type        | Numeric                               |       |         |
|                     | Format      | F1                                    |       |         |
|                     | Measurement | Nominal                               |       |         |
|                     | Role        | Input                                 |       |         |
| Valid Values        | 1           | YES                                   | 428   | 28.5%   |
|                     | 2           | NO                                    | 521   | 34.7%   |
| Missing Values      | 0           | IAP                                   | 516   | 34.4%   |
|                     | 8           | DK                                    | 24    | 1.6%    |
|                     | 9           | NA                                    | 11    | 0.7%    |

**ABRAPE**

|                     |             | Value                      | Count | Percent |
|---------------------|-------------|----------------------------|-------|---------|
| Standard Attributes | Position    | 6                          |       |         |
|                     | Label       | Pregnant as result of rape |       |         |
|                     | Type        | Numeric                    |       |         |
|                     | Format      | F1                         |       |         |
|                     | Measurement | Nominal                    |       |         |
|                     | Role        | Input                      |       |         |
| Valid Values        | 1           | YES                        | 737   | 49.1%   |
|                     | 2           | NO                         | 215   | 14.3%   |
| Missing Values      | 0           | IAP                        | 516   | 34.4%   |
|                     | 8           | DK                         | 17    | 1.1%    |
|                     | 9           | NA                         | 15    | 1.0%    |

**ABSINGLE**

|                     |             | Value       | Count | Percent |
|---------------------|-------------|-------------|-------|---------|
| Standard Attributes | Position    | 7           |       |         |
|                     | Label       | Not married |       |         |
|                     | Type        | Numeric     |       |         |
|                     | Format      | F1          |       |         |
|                     | Measurement | Nominal     |       |         |
|                     | Role        | Input       |       |         |
| Valid Values        | 1           | YES         | 421   | 28.1%   |
|                     | 2           | NO          | 538   | 35.9%   |
| Missing Values      | 0           | IAP         | 516   | 34.4%   |
|                     | 8           | DK          | 11    | 0.7%    |
|                     | 9           | NA          | 14    | 0.9%    |

**AGE**

|                     |             | Value             | Count | Percent |
|---------------------|-------------|-------------------|-------|---------|
| Standard Attributes | Position    | 8                 |       |         |
|                     | Label       | Age of respondent |       |         |
|                     | Type        | Numeric           |       |         |
|                     | Format      | F2                |       |         |
|                     | Measurement | Scale             |       |         |
|                     | Role        | Input             |       |         |
| N                   | Valid       | 1495              |       |         |
|                     | Missing     | 5                 |       |         |

(Continued)

(Continued)

|                                 |                    | Value       | Count | Percent |
|---------------------------------|--------------------|-------------|-------|---------|
| Central Tendency and Dispersion | Mean               | 49.16       |       |         |
|                                 | Standard Deviation | 17.476      |       |         |
|                                 | Percentile 25      | 34.00       |       |         |
|                                 | Percentile 50      | 50.00       |       |         |
|                                 | Percentile 75      | 62.00       |       |         |
| Labeled Values                  | 89                 | 89 OR OLDER | 7     | 0.5%    |
|                                 | 98                 | DK          | 0     | 0.0%    |
|                                 | 99                 | NA          | 5     | 0.3%    |

### ATTEND

|                     |             | Value                                  | Count | Percent |
|---------------------|-------------|----------------------------------------|-------|---------|
| Standard Attributes | Position    | 9                                      |       |         |
|                     | Label       | How often R attends religious services |       |         |
|                     | Type        | Numeric                                |       |         |
|                     | Format      | F1                                     |       |         |
|                     | Measurement | Nominal                                |       |         |
|                     | Role        | Input                                  |       |         |
| Valid Values        | 0           | NEVER                                  | 368   | 24.5%   |
|                     | 1           | LT ONCE A YEAR                         | 79    | 5.3%    |
|                     | 2           | ONCE A YEAR                            | 217   | 14.5%   |
|                     | 3           | SEVRL TIMES A YR                       | 158   | 10.5%   |
|                     | 4           | ONCE A MONTH                           | 105   | 7.0%    |
|                     | 5           | 2-3X A MONTH                           | 135   | 9.0%    |
|                     | 6           | NRLY EVERY WEEK                        | 78    | 5.2%    |
|                     | 7           | EVERY WEEK                             | 252   | 16.8%   |
|                     | 8           | MORE THN ONCE WK                       | 97    | 6.5%    |
| Missing Values      | 9           | DK, NA                                 | 11    | 0.7%    |

### CAPPUN

|                     |             | Value                                    | Count | Percent |
|---------------------|-------------|------------------------------------------|-------|---------|
| Standard Attributes | Position    | 10                                       |       |         |
|                     | Label       | Favor or oppose death penalty for murder |       |         |
|                     | Type        | Numeric                                  |       |         |
|                     | Format      | F1                                       |       |         |
|                     | Measurement | Nominal                                  |       |         |
|                     | Role        | Input                                    |       |         |
| Valid Values        | 1           | FAVOR                                    | 855   | 57.0%   |
|                     | 2           | OPPOSE                                   | 546   | 36.4%   |

|                |   | Value | Count | Percent |
|----------------|---|-------|-------|---------|
| Missing Values | 0 | IAP   | 0     | 0.0%    |
|                | 8 | DK    | 79    | 5.3%    |
|                | 9 | NA    | 20    | 1.3%    |

**CHLDIDEL**

|                     |             | Value                    | Count | Percent |
|---------------------|-------------|--------------------------|-------|---------|
| Standard Attributes | Position    | 11                       |       |         |
|                     | Label       | Ideal number of children |       |         |
|                     | Type        | Numeric                  |       |         |
|                     | Format      | F1                       |       |         |
|                     | Measurement | Nominal                  |       |         |
|                     | Role        | Input                    |       |         |
| Valid Values        | 0           |                          | 7     | 0.5%    |
|                     | 1           |                          | 16    | 1.1%    |
|                     | 2           |                          | 449   | 29.9%   |
|                     | 3           |                          | 246   | 16.4%   |
|                     | 4           |                          | 108   | 7.2%    |
|                     | 5           |                          | 17    | 1.1%    |
|                     | 6           |                          | 4     | 0.3%    |
|                     | 7           | SEVEN+                   | 7     | 0.5%    |
| Missing Values      | 8           | AS MANY AS WANT          | 134   | 8.9%    |
|                     | -1          | IAP                      | 512   | 34.1%   |
|                     | 9           | DK, NA                   | 0     | 0.0%    |

**CLASS**

|                     |             | Value                           | Count | Percent |
|---------------------|-------------|---------------------------------|-------|---------|
| Standard Attributes | Position    | 12                              |       |         |
|                     | Label       | Subjective class identification |       |         |
|                     | Type        | Numeric                         |       |         |
|                     | Format      | F1                              |       |         |
|                     | Measurement | Nominal                         |       |         |
|                     | Role        | Input                           |       |         |
| Valid Values        | 1           | LOWER CLASS                     | 148   | 9.9%    |
|                     | 2           | WORKING CLASS                   | 687   | 45.8%   |
|                     | 3           | MIDDLE CLASS                    | 608   | 40.5%   |
|                     | 4           | UPPER CLASS                     | 44    | 2.9%    |
|                     | 5           | NO CLASS                        | 0     | 0.0%    |
| Missing Values      | 0           | IAP                             | 0     | 0.0%    |
|                     | 8           | DK                              | 9     | 0.6%    |
|                     | 9           | NA                              | 4     | 0.3%    |

### EDUC

|                     |                | Value                            | Count | Percent |
|---------------------|----------------|----------------------------------|-------|---------|
| Standard Attributes | Position       | 13                               |       |         |
|                     | Label          | Highest year of school completed |       |         |
|                     | Type           | Numeric                          |       |         |
|                     | Format         | F2                               |       |         |
|                     | Measurement    | Nominal                          |       |         |
|                     | Role           | Input                            |       |         |
| Valid Values        | 0              |                                  | 1     | 0.1%    |
|                     | 3              |                                  | 2     | 0.1%    |
|                     | 4              |                                  | 1     | 0.1%    |
|                     | 5              |                                  | 1     | 0.1%    |
|                     | 6              |                                  | 12    | 0.8%    |
|                     | 7              |                                  | 10    | 0.7%    |
|                     | 8              |                                  | 23    | 1.5%    |
|                     | 9              |                                  | 28    | 1.9%    |
|                     | 10             |                                  | 41    | 2.7%    |
|                     | 11             |                                  | 61    | 4.1%    |
|                     | 12             |                                  | 427   | 28.5%   |
|                     | 13             |                                  | 131   | 8.7%    |
|                     | 14             |                                  | 193   | 12.9%   |
|                     | 15             |                                  | 77    | 5.1%    |
|                     | 16             |                                  | 266   | 17.7%   |
|                     | 17             |                                  | 61    | 4.1%    |
|                     | 18             |                                  | 74    | 4.9%    |
|                     | 19             |                                  | 26    | 1.7%    |
|                     | 20             |                                  | 58    | 3.9%    |
|                     | Missing Values | 97                               | IAP   | 0       |
| 98                  |                | DK                               | 1     | 0.1%    |
| 99                  |                | NA                               | 6     | 0.4%    |

### EVSTRAY

|                     |             | Value                                    | Count | Percent |
|---------------------|-------------|------------------------------------------|-------|---------|
| Standard Attributes | Position    | 14                                       |       |         |
|                     | Label       | Have sex other than spouse while married |       |         |
|                     | Type        | Numeric                                  |       |         |
|                     | Format      | F1                                       |       |         |
|                     | Measurement | Nominal                                  |       |         |
|                     | Role        | Input                                    |       |         |

|                |   | Value         | Count | Percent |
|----------------|---|---------------|-------|---------|
| Valid Values   | 1 | YES           | 122   | 8.1%    |
|                | 2 | NO            | 537   | 35.8%   |
|                | 3 | NEVER MARRIED | 257   | 17.1%   |
| Missing Values | 0 | IAP           | 567   | 37.8%   |
|                | 8 | DK            | 0     | 0.0%    |
|                | 9 | NA            | 17    | 1.1%    |

### GETAHEAD

|                     |             | Value                           | Count | Percent |
|---------------------|-------------|---------------------------------|-------|---------|
| Standard Attributes | Position    | 15                              |       |         |
|                     | Label       | Opinion of how people get ahead |       |         |
|                     | Type        | Numeric                         |       |         |
|                     | Format      | F1                              |       |         |
|                     | Measurement | Nominal                         |       |         |
|                     | Role        | Input                           |       |         |
| Valid Values        | 1           | HARD WORK                       | 670   | 44.7%   |
|                     | 2           | BOTH EQUALLY                    | 174   | 11.6%   |
|                     | 3           | LUCK OR HELP                    | 129   | 8.6%    |
|                     | 4           | OTHER                           | 0     | 0.0%    |
| Missing Values      | 0           | IAP                             | 519   | 34.6%   |
|                     | 8           | DK                              | 5     | 0.3%    |
|                     | 9           | NA                              | 3     | 0.2%    |

### GUNLAW

|                     |             | Value                       | Count | Percent |
|---------------------|-------------|-----------------------------|-------|---------|
| Standard Attributes | Position    | 16                          |       |         |
|                     | Label       | Favor or oppose gun permits |       |         |
|                     | Type        | Numeric                     |       |         |
|                     | Format      | F1                          |       |         |
|                     | Measurement | Nominal                     |       |         |
|                     | Role        | Input                       |       |         |
| Valid Values        | 1           | FAVOR                       | 682   | 45.5%   |
|                     | 2           | OPPOSE                      | 284   | 18.9%   |
| Missing Values      | 0           | IAP                         | 516   | 34.4%   |
|                     | 8           | DK                          | 15    | 1.0%    |
|                     | 9           | NA                          | 3     | 0.2%    |

### HELPOTH

|                     |             | Value           | Count | Percent |
|---------------------|-------------|-----------------|-------|---------|
| Standard Attributes | Position    | 17              |       |         |
|                     | Label       | To help others  |       |         |
|                     | Type        | Numeric         |       |         |
|                     | Format      | F1              |       |         |
|                     | Measurement | Nominal         |       |         |
|                     | Role        | Input           |       |         |
| Valid Values        | 1           | MOST IMPORTANT  | 187   | 12.5%   |
|                     | 2           | 2ND IMPORTANT   | 346   | 23.1%   |
|                     | 3           | 3RD IMPORTANT   | 349   | 23.3%   |
|                     | 4           | 4TH IMPORTANT   | 124   | 8.3%    |
|                     | 5           | LEAST IMPORTANT | 10    | 0.7%    |
| Missing Values      | 0           | IAP             | 473   | 31.5%   |
|                     | 8           | DK              | 0     | 0.0%    |
|                     | 9           | NA              | 11    | 0.7%    |

### HISPANIC

|                                 |                    | Value                                | Count | Percent |
|---------------------------------|--------------------|--------------------------------------|-------|---------|
| Standard Attributes             | Position           | 18                                   |       |         |
|                                 | Label              | Hispanic specified                   |       |         |
|                                 | Type               | Numeric                              |       |         |
|                                 | Format             | F2                                   |       |         |
|                                 | Measurement        | Scale                                |       |         |
|                                 | Role               | Input                                |       |         |
| N                               | Valid              | 1499                                 |       |         |
|                                 | Missing            | 1                                    |       |         |
| Central Tendency and Dispersion | Mean               | 1.87                                 |       |         |
|                                 | Standard Deviation | 4.690                                |       |         |
|                                 | Percentile 25      | 1.00                                 |       |         |
|                                 | Percentile 50      | 1.00                                 |       |         |
|                                 | Percentile 75      | 1.00                                 |       |         |
| Labeled Values                  | 0                  | IAP                                  | 0     | 0.0%    |
|                                 | 1                  | NOT HISPANIC                         | 1312  | 87.5%   |
|                                 | 2                  | MEXICAN, MEXICAN AMERICAN, CHICANO/A | 99    | 6.6%    |
|                                 | 3                  | PUERTO RICAN                         | 22    | 1.5%    |
|                                 | 4                  | CUBAN                                | 10    | 0.7%    |
|                                 | 5                  | SALVADORIAN                          | 7     | 0.5%    |
|                                 | 6                  | GUATEMALAN                           | 5     | 0.3%    |



|    | Value                | Count | Percent |
|----|----------------------|-------|---------|
| 7  | PANAMANIAN           | 2     | 0.1%    |
| 8  | NICARAGUAN           | 1     | 0.1%    |
| 9  | COSTA RICAN          | 0     | 0.0%    |
| 10 | CENTRAL AMERICAN     | 3     | 0.2%    |
| 11 | HONDURAN             | 4     | 0.3%    |
| 15 | DOMINICAN            | 6     | 0.4%    |
| 16 | WEST INDIAN          | 0     | 0.0%    |
| 20 | PERUVIAN             | 1     | 0.1%    |
| 21 | EQUADORIAN           | 0     | 0.0%    |
| 22 | COLUMBIAN            | 1     | 0.1%    |
| 23 | VENEZUELAN           | 1     | 0.1%    |
| 24 | Argentinian          | 2     | 0.1%    |
| 25 | Chilean              | 0     | 0.0%    |
| 30 | SPANISH              | 14    | 0.9%    |
| 31 | BASQUE               | 0     | 0.0%    |
| 35 | FILIPINO/A           | 1     | 0.1%    |
| 40 | LATIN AMERICAN       | 0     | 0.0%    |
| 41 | SOUTH AMERICAN       | 1     | 0.1%    |
| 42 | American             | 1     | 0.1%    |
| 45 | LATIN                | 0     | 0.0%    |
| 46 | LATINO/A             | 2     | 0.1%    |
| 47 | HISPANIC             | 2     | 0.1%    |
| 50 | OTHER, NOT SPECIFIED | 2     | 0.1%    |
| 98 | DK                   | 0     | 0.0%    |
| 99 | NA                   | 1     | 0.1%    |

### HOMOSEX

|                     | Value       | Count                    | Percent   |
|---------------------|-------------|--------------------------|-----------|
| Standard Attributes | Position    | 19                       |           |
|                     | Label       | Homosexual sex relations |           |
|                     | Type        | Numeric                  |           |
|                     | Format      | F1                       |           |
|                     | Measurement | Nominal                  |           |
|                     | Role        | Input                    |           |
| Valid Values        | 1           | ALWAYS WRONG             | 364 24.3% |
|                     | 2           | ALMST ALWAYS WRG         | 31 2.1%   |
|                     | 3           | SOMETIMES WRONG          | 60 4.0%   |

(Continued)

(Continued)

|                |   | Value            | Count | Percent |
|----------------|---|------------------|-------|---------|
|                | 4 | NOT WRONG AT ALL | 491   | 32.7%   |
|                | 5 | OTHER            | 0     | 0.0%    |
| Missing Values | 0 | IAP              | 516   | 34.4%   |
|                | 8 | DK               | 21    | 1.4%    |
|                | 9 | NA               | 17    | 1.1%    |

**INCOME**

|                     |             | Value               | Count | Percent |
|---------------------|-------------|---------------------|-------|---------|
| Standard Attributes | Position    | 20                  |       |         |
|                     | Label       | Total family income |       |         |
|                     | Type        | Numeric             |       |         |
|                     | Format      | F2                  |       |         |
|                     | Measurement | Nominal             |       |         |
|                     | Role        | Input               |       |         |
| Valid Values        | 1           | LT \$1000           | 32    | 2.1%    |
|                     | 2           | \$1000 TO 2999      | 22    | 1.5%    |
|                     | 3           | \$3000 TO 3999      | 9     | 0.6%    |
|                     | 4           | \$4000 TO 4999      | 3     | 0.2%    |
|                     | 5           | \$5000 TO 5999      | 9     | 0.6%    |
|                     | 6           | \$6000 TO 6999      | 8     | 0.5%    |
|                     | 7           | \$7000 TO 7999      | 6     | 0.4%    |
|                     | 8           | \$8000 TO 9999      | 24    | 1.6%    |
|                     | 9           | \$10000 - 14999     | 85    | 5.7%    |
|                     | 10          | \$15000 - 19999     | 52    | 3.5%    |
|                     | 11          | \$20000 - 24999     | 108   | 7.2%    |
|                     | 12          | \$25000 OR MORE     | 919   | 61.3%   |
| Missing Values      | 0           | IAP                 | 0     | 0.0%    |
|                     | 13          | REFUSED             | 156   | 10.4%   |
|                     | 98          | DK                  | 67    | 4.5%    |
|                     | 99          | NA                  | 0     | 0.0%    |

**MAEDUC**

|                     |             | Value                                 | Count | Percent |
|---------------------|-------------|---------------------------------------|-------|---------|
| Standard Attributes | Position    | 21                                    |       |         |
|                     | Label       | Highest year school completed, mother |       |         |
|                     | Type        | Numeric                               |       |         |
|                     | Format      | F2                                    |       |         |
|                     | Measurement | Scale                                 |       |         |
|                     | Role        | Input                                 |       |         |

|                                 |                    | Value | Count | Percent |
|---------------------------------|--------------------|-------|-------|---------|
| N                               | Valid              | 1355  |       |         |
|                                 | Missing            | 145   |       |         |
| Central Tendency and Dispersion | Mean               | 11.99 |       |         |
|                                 | Standard Deviation | 3.648 |       |         |
|                                 | Percentile 25      | 11.00 |       |         |
|                                 | Percentile 50      | 12.00 |       |         |
|                                 | Percentile 75      | 14.00 |       |         |
| Labeled Values                  | 97                 | IAP   | 56    | 3.7%    |
|                                 | 98                 | DK    | 86    | 5.7%    |
|                                 | 99                 | NA    | 3     | 0.2%    |

**MARBLK**

|                     |              | Value                      | Count          | Percent |
|---------------------|--------------|----------------------------|----------------|---------|
| Standard Attributes | Position     | 22                         |                |         |
|                     | Label        | Close relative marry Black |                |         |
|                     | Type         | Numeric                    |                |         |
|                     | Format       | F1                         |                |         |
|                     | Measurement  | Nominal                    |                |         |
|                     | Role         | Input                      |                |         |
|                     | Valid Values | 1                          | STRONGLY FAVOR | 223     |
| 2                   |              | FAVOR                      | 131            | 8.7%    |
| 3                   |              | NEITHER FAVOR NOR OPPOSE   | 513            | 34.2%   |
| 4                   |              | OPPOSE                     | 77             | 5.1%    |
| 5                   |              | STRONGLY OPPOSE            | 42             | 2.8%    |
| Missing Values      | 0            | IAP                        | 511            | 34.1%   |
|                     | 8            | DONT KNOW                  | 2              | 0.1%    |
|                     | 9            | NA                         | 1              | 0.1%    |

**MARITAL**

|                     |             | Value          | Count | Percent |
|---------------------|-------------|----------------|-------|---------|
| Standard Attributes | Position    | 23             |       |         |
|                     | Label       | Marital status |       |         |
|                     | Type        | Numeric        |       |         |
|                     | Format      | F1             |       |         |
|                     | Measurement | Nominal        |       |         |
|                     | Role        | Input          |       |         |

(Continued)

[Continued]

|                |   | Value         | Count | Percent |
|----------------|---|---------------|-------|---------|
| Valid Values   | 1 | MARRIED       | 644   | 42.9%   |
|                | 2 | WIDOWED       | 136   | 9.1%    |
|                | 3 | DIVORCED      | 259   | 17.3%   |
|                | 4 | SEPARATED     | 68    | 4.5%    |
|                | 5 | NEVER MARRIED | 392   | 26.1%   |
| Missing Values | 9 | NA            | 1     | 0.1%    |

**OBEY**

|                     |             | Value           | Count | Percent |
|---------------------|-------------|-----------------|-------|---------|
| Standard Attributes | Position    | 24              |       |         |
|                     | Label       | To obey         |       |         |
|                     | Type        | Numeric         |       |         |
|                     | Format      | F1              |       |         |
|                     | Measurement | Nominal         |       |         |
|                     | Role        | Input           |       |         |
| Valid Values        | 1           | MOST IMPORTANT  | 122   | 8.1%    |
|                     | 2           | 2ND IMPORTANT   | 114   | 7.6%    |
|                     | 3           | 3RD IMPORTANT   | 172   | 11.5%   |
|                     | 4           | 4TH IMPORTANT   | 435   | 29.0%   |
|                     | 5           | LEAST IMPORTANT | 173   | 11.5%   |
| Missing Values      | 0           | IAP             | 473   | 31.5%   |
|                     | 8           | DK              | 0     | 0.0%    |
|                     | 9           | NA              | 11    | 0.7%    |

**PAEDUC**

|                                 |                    | Value                                 | Count | Percent |
|---------------------------------|--------------------|---------------------------------------|-------|---------|
| Standard Attributes             | Position           | 25                                    |       |         |
|                                 | Label              | Highest year school completed, father |       |         |
|                                 | Type               | Numeric                               |       |         |
|                                 | Format             | F2                                    |       |         |
|                                 | Measurement        | Scale                                 |       |         |
|                                 | Role               | Input                                 |       |         |
| N                               | Valid              | 1110                                  |       |         |
|                                 | Missing            | 390                                   |       |         |
| Central Tendency and Dispersion | Mean               | 11.86                                 |       |         |
|                                 | Standard Deviation | 4.015                                 |       |         |
|                                 | Percentile 25      | 10.00                                 |       |         |

|                |               | Value | Count | Percent |
|----------------|---------------|-------|-------|---------|
| Labeled Values | Percentile 50 | 12.00 |       |         |
|                | Percentile 75 | 14.00 |       |         |
|                | 97            | IAP   | 274   | 18.3%   |
|                | 98            | DK    | 113   | 7.5%    |
|                | 99            | NA    | 3     | 0.2%    |

**PARTNERS**

|                     |             | Value                                     | Count | Percent |
|---------------------|-------------|-------------------------------------------|-------|---------|
| Standard Attributes | Position    | 26                                        |       |         |
|                     | Label       | How many sex partner's R had in last year |       |         |
|                     | Type        | Numeric                                   |       |         |
|                     | Format      | F2                                        |       |         |
|                     | Measurement | Nominal                                   |       |         |
|                     | Role        | Input                                     |       |         |
| Valid Values        | 0           | NO PARTNERS                               | 206   | 13.7%   |
|                     | 1           | 1 PARTNER                                 | 582   | 38.8%   |
|                     | 2           | 2 PARTNERS                                | 67    | 4.5%    |
|                     | 3           | 3 PARTNERS                                | 23    | 1.5%    |
|                     | 4           | 4 PARTNERS                                | 17    | 1.1%    |
|                     | 5           | 5-10 PARTNERS                             | 22    | 1.5%    |
|                     | 6           | 11-20 PARTNERS                            | 9     | 0.6%    |
|                     | 7           | 21-100 PARTNERS                           | 1     | 0.1%    |
|                     | 8           | MORE THAN 100 PARTNERS                    | 0     | 0.0%    |
|                     | 9           | 1 OR MORE, # unknown                      | 5     | 0.3%    |
| Missing Values      | 95          | SEVERAL                                   | 0     | 0.0%    |
|                     | -1          | IAP                                       | 567   | 37.8%   |
|                     | 98          | DK                                        | 0     | 0.0%    |
|                     | 99          | NA                                        | 1     | 0.1%    |

**PARTYID**

|                     |             | Value                       | Count | Percent |
|---------------------|-------------|-----------------------------|-------|---------|
| Standard Attributes | Position    | 27                          |       |         |
|                     | Label       | Political party affiliation |       |         |
|                     | Type        | Numeric                     |       |         |
|                     | Format      | F1                          |       |         |
|                     | Measurement | Nominal                     |       |         |
|                     | Role        | Input                       |       |         |

(Continued)

(Continued)

|                |   | Value              | Count | Percent |
|----------------|---|--------------------|-------|---------|
| Valid Values   | 0 | STRONG DEMOCRAT    | 239   | 15.9%   |
|                | 1 | NOT STR DEMOCRAT   | 247   | 16.5%   |
|                | 2 | IND,NEAR DEM       | 210   | 14.0%   |
|                | 3 | INDEPENDENT        | 250   | 16.7%   |
|                | 4 | IND,NEAR REP       | 147   | 9.8%    |
|                | 5 | NOT STR REPUBLICAN | 199   | 13.3%   |
|                | 6 | STRONG REPUBLICAN  | 152   | 10.1%   |
|                | 7 | OTHER PARTY        | 34    | 2.3%    |
| Missing Values | 8 | DK                 | 0     | 0.0%    |
|                | 9 | NA                 | 22    | 1.5%    |

**PIKUPSEX**

|                     |              | Value                                | Count                | Percent |
|---------------------|--------------|--------------------------------------|----------------------|---------|
| Standard Attributes | Position     | 28                                   |                      |         |
|                     | Label        | R had sex with casual date last year |                      |         |
|                     | Type         | Numeric                              |                      |         |
|                     | Format       | F1                                   |                      |         |
|                     | Measurement  | Nominal                              |                      |         |
|                     | Role         | Input                                |                      |         |
|                     | Valid Values | 1                                    | HAD SEX WITH PICK-UP | 79      |
|                     | 2            | NOT SELECTED                         | 93                   | 6.2%    |
| Missing Values      | 0            | IAP                                  | 1321                 | 88.1%   |
|                     | 8            | DK                                   | 0                    | 0.0%    |
|                     | 9            | NA                                   | 7                    | 0.5%    |

**POLVIEWS**

|                     |             | Value                                    | Count | Percent |
|---------------------|-------------|------------------------------------------|-------|---------|
| Standard Attributes | Position    | 29                                       |       |         |
|                     | Label       | Think of self as liberal or conservative |       |         |
|                     | Type        | Numeric                                  |       |         |
|                     | Format      | F1                                       |       |         |
|                     | Measurement | Nominal                                  |       |         |
|                     | Role        | Input                                    |       |         |

|                |   | Value                 | Count | Percent |
|----------------|---|-----------------------|-------|---------|
| Valid Values   | 1 | EXTREMELY LIBERAL     | 72    | 4.8%    |
|                | 2 | LIBERAL               | 188   | 12.5%   |
|                | 3 | SLIGHTLY LIBERAL      | 156   | 10.4%   |
|                | 4 | MODERATE              | 519   | 34.6%   |
|                | 5 | SLIGHTLY CONSERVATIVE | 210   | 14.0%   |
|                | 6 | CONSERVATIVE          | 227   | 15.1%   |
|                | 7 | EXTRMLY CONSERVATIVE  | 66    | 4.4%    |
| Missing Values | 0 | IAP                   | 0     | 0.0%    |
|                | 8 | DK                    | 43    | 2.9%    |
|                | 9 | NA                    | 19    | 1.3%    |

### POPULAR

|                     |             | Value                       | Count | Percent |
|---------------------|-------------|-----------------------------|-------|---------|
| Standard Attributes | Position    | 30                          |       |         |
|                     | Label       | To be well liked or popular |       |         |
|                     | Type        | Numeric                     |       |         |
|                     | Format      | F1                          |       |         |
|                     | Measurement | Nominal                     |       |         |
|                     | Role        | Input                       |       |         |
| Valid Values        | 1           | MOST IMPORTANT              | 4     | 0.3%    |
|                     | 2           | 2ND IMPORTANT               | 12    | 0.8%    |
|                     | 3           | 3RD IMPORTANT               | 25    | 1.7%    |
|                     | 4           | 4TH IMPORTANT               | 201   | 13.4%   |
|                     | 5           | LEAST IMPORTANT             | 774   | 51.6%   |
| Missing Values      | 0           | IAP                         | 473   | 31.5%   |
|                     | 8           | DK                          | 0     | 0.0%    |
|                     | 9           | NA                          | 11    | 0.7%    |

### POSTLIFE

|                     |             | Value                      | Count | Percent |
|---------------------|-------------|----------------------------|-------|---------|
| Standard Attributes | Position    | 31                         |       |         |
|                     | Label       | Belief in life after death |       |         |
|                     | Type        | Numeric                    |       |         |
|                     | Format      | F1                         |       |         |
|                     | Measurement | Nominal                    |       |         |
|                     | Role        | Input                      |       |         |

(Continued)

(Continued)

|                |   | Value | Count | Percent |
|----------------|---|-------|-------|---------|
| Valid Values   | 1 | YES   | 1090  | 72.7%   |
|                | 2 | NO    | 257   | 17.1%   |
| Missing Values | 0 | IAP   | 0     | 0.0%    |
|                | 8 | DK    | 148   | 9.9%    |
|                | 9 | NA    | 5     | 0.3%    |

**PRAY**

|                     |             | Value                 | Count | Percent |
|---------------------|-------------|-----------------------|-------|---------|
| Standard Attributes | Position    | 32                    |       |         |
|                     | Label       | How often does R pray |       |         |
|                     | Type        | Numeric               |       |         |
|                     | Format      | F1                    |       |         |
|                     | Measurement | Nominal               |       |         |
|                     | Role        | Input                 |       |         |
| Valid Values        | 1           | SEVERAL TIMES A DAY   | 441   | 29.4%   |
|                     | 2           | ONCE A DAY            | 443   | 29.5%   |
|                     | 3           | SEVERAL TIMES A WEEK  | 148   | 9.9%    |
|                     | 4           | ONCE A WEEK           | 100   | 6.7%    |
|                     | 5           | LT ONCE A WEEK        | 133   | 8.9%    |
|                     | 6           | NEVER                 | 215   | 14.3%   |
| Missing Values      | 0           | IAP                   | 0     | 0.0%    |
|                     | 8           | DK                    | 4     | 0.3%    |
|                     | 9           | NA                    | 16    | 1.1%    |

**PREMARSX**

|                     |             | Value               | Count | Percent |
|---------------------|-------------|---------------------|-------|---------|
| Standard Attributes | Position    | 33                  |       |         |
|                     | Label       | Sex before marriage |       |         |
|                     | Type        | Numeric             |       |         |
|                     | Format      | F1                  |       |         |
|                     | Measurement | Nominal             |       |         |
|                     | Role        | Input               |       |         |
| Valid Values        | 1           | ALWAYS WRONG        | 200   | 13.3%   |
|                     | 2           | ALMST ALWAYS WRG    | 54    | 3.6%    |
|                     | 3           | SOMETIMES WRONG     | 137   | 9.1%    |
|                     | 4           | NOT WRONG AT ALL    | 578   | 38.5%   |
|                     | 5           | OTHER               | 0     | 0.0%    |
| Missing Values      | 0           | IAP                 | 511   | 34.1%   |
|                     | 8           | DK                  | 15    | 1.0%    |
|                     | 9           | NA                  | 5     | 0.3%    |



**RACDIF4**

|                     |             | Value                           | Count | Percent |
|---------------------|-------------|---------------------------------|-------|---------|
| Standard Attributes | Position    | 34                              |       |         |
|                     | Label       | Differences due to lack of will |       |         |
|                     | Type        | Numeric                         |       |         |
|                     | Format      | F1                              |       |         |
|                     | Measurement | Nominal                         |       |         |
|                     | Role        | Input                           |       |         |
| Valid Values        | 1           | YES                             | 398   | 26.5%   |
|                     | 2           | NO                              | 560   | 37.3%   |
| Missing Values      | 0           | IAP                             | 511   | 34.1%   |
|                     | 8           | DK                              | 28    | 1.9%    |
|                     | 9           | NA                              | 3     | 0.2%    |

**RACE**

|                     |             | Value              | Count | Percent |
|---------------------|-------------|--------------------|-------|---------|
| Standard Attributes | Position    | 35                 |       |         |
|                     | Label       | Race of respondent |       |         |
|                     | Type        | Numeric            |       |         |
|                     | Format      | F1                 |       |         |
|                     | Measurement | Nominal            |       |         |
|                     | Role        | Input              |       |         |
| Valid Values        | 1           | WHITE              | 1105  | 73.7%   |
|                     | 2           | BLACK              | 250   | 16.7%   |
|                     | 3           | OTHER              | 145   | 9.7%    |
| Missing Values      | 0           | IAP                | 0     | 0.0%    |

**RELIG**

|                     |             | Value                    | Count | Percent |
|---------------------|-------------|--------------------------|-------|---------|
| Standard Attributes | Position    | 36                       |       |         |
|                     | Label       | R's religious preference |       |         |
|                     | Type        | Numeric                  |       |         |
|                     | Format      | F2                       |       |         |
|                     | Measurement | Nominal                  |       |         |
|                     | Role        | Input                    |       |         |
| Valid Values        | 1           | PROTESTANT               | 731   | 48.7%   |
|                     | 2           | CATHOLIC                 | 348   | 23.2%   |
|                     | 3           | JEWISH                   | 25    | 1.7%    |
|                     | 4           | NONE                     | 297   | 19.8%   |

(Continued)

(Continued)

|                |    | Value                   | Count | Percent |
|----------------|----|-------------------------|-------|---------|
|                | 5  | OTHER                   | 23    | 1.5%    |
|                | 6  | BUDDHISM                | 13    | 0.9%    |
|                | 7  | HINDUISM                | 7     | 0.5%    |
|                | 8  | OTHER EASTERN           | 3     | 0.2%    |
|                | 9  | MOSLEM/ISLAM            | 11    | 0.7%    |
|                | 10 | ORTHODOX-CHRISTIAN      | 5     | 0.3%    |
|                | 11 | CHRISTIAN               | 24    | 1.6%    |
|                | 12 | NATIVE AMERICAN         | 1     | 0.1%    |
|                | 13 | INTER-NONDENOMINATIONAL | 4     | 0.3%    |
| Missing Values | 0  | IAP                     | 0     | 0.0%    |
|                | 98 | DK                      | 1     | 0.1%    |
|                | 99 | NA                      | 7     | 0.5%    |

**RINCOM16**

|                                 |                    | Value               | Count | Percent |
|---------------------------------|--------------------|---------------------|-------|---------|
| Standard Attributes             | Position           | 37                  |       |         |
|                                 | Label              | Respondent's income |       |         |
|                                 | Type               | Numeric             |       |         |
|                                 | Format             | F8                  |       |         |
|                                 | Measurement        | Scale               |       |         |
|                                 | Role               | Input               |       |         |
| N                               | Valid              | 860                 |       |         |
|                                 | Missing            | 640                 |       |         |
| Central Tendency and Dispersion | Mean               | 15.35               |       |         |
|                                 | Standard Deviation | 6.061               |       |         |
|                                 | Percentile 25      | 12.00               |       |         |
|                                 | Percentile 50      | 17.00               |       |         |
|                                 | Percentile 75      | 20.00               |       |         |
| Labeled Values                  | 0                  | IAP                 | 589   | 39.3%   |
|                                 | 1                  | UNDER \$1000        | 11    | 0.7%    |
|                                 | 2                  | \$1000 TO 2999      | 28    | 1.9%    |
|                                 | 3                  | \$3000 TO 3999      | 18    | 1.2%    |
|                                 | 4                  | \$4000 TO 4999      | 13    | 0.9%    |
|                                 | 5                  | \$5000 TO 5999      | 18    | 1.2%    |
|                                 | 6                  | \$6000 TO 6999      | 18    | 1.2%    |
|                                 | 7                  | \$7000 TO 7999      | 9     | 0.6%    |
|                                 | 8                  | \$8000 TO 9999      | 20    | 1.3%    |
|                                 | 9                  | \$10000 TO 12499    | 24    | 1.6%    |
|                                 | 10                 | \$12500 TO 14999    | 15    | 1.0%    |

|    | Value                | Count | Percent |
|----|----------------------|-------|---------|
| 11 | \$15000 TO 17499     | 26    | 1.7%    |
| 12 | \$17500 TO 19999     | 23    | 1.5%    |
| 13 | \$20000 TO 22499     | 41    | 2.7%    |
| 14 | \$22500 TO 24999     | 43    | 2.9%    |
| 15 | \$25000 TO 29999     | 52    | 3.5%    |
| 16 | \$30000 TO 34999     | 68    | 4.5%    |
| 17 | \$35000 TO 39999     | 58    | 3.9%    |
| 18 | \$40000 TO 49999     | 82    | 5.5%    |
| 19 | \$50000 TO 59999     | 72    | 4.8%    |
| 20 | \$60000 TO 74999     | 75    | 5.0%    |
| 21 | \$75000 TO \$89999   | 46    | 3.1%    |
| 22 | \$90000 TO \$109999  | 35    | 2.3%    |
| 23 | \$110000 TO \$129999 | 17    | 1.1%    |
| 24 | \$130000 TO \$149999 | 12    | 0.8%    |
| 25 | \$150000 TO \$169999 | 6     | 0.4%    |
| 26 | \$170000 OR OVER     | 30    | 2.0%    |
| 27 | REFUSED              | 42    | 2.8%    |
| 98 | DK                   | 9     | 0.6%    |
| 99 | NA                   | 0     | 0.0%    |

### SEX

|                     | Value       | Count            | Percent   |
|---------------------|-------------|------------------|-----------|
| Standard Attributes | Position    | 38               |           |
|                     | Label       | Respondent's sex |           |
|                     | Type        | Numeric          |           |
|                     | Format      | F1               |           |
|                     | Measurement | Nominal          |           |
|                     | Role        | Input            |           |
| Valid Values        | 1           | MALE             | 681 45.4% |
|                     | 2           | FEMALE           | 819 54.6% |

### SEXFREQ

|                     | Value       | Count                             | Percent |
|---------------------|-------------|-----------------------------------|---------|
| Standard Attributes | Position    | 39                                |         |
|                     | Label       | Frequency of sex during last year |         |
|                     | Type        | Numeric                           |         |
|                     | Format      | F1                                |         |
|                     | Measurement | Nominal                           |         |
|                     | Role        | Input                             |         |

(Continued)

(Continued)

|                |    | Value             | Count | Percent |
|----------------|----|-------------------|-------|---------|
| Valid Values   | 0  | NOT AT ALL        | 225   | 15.0%   |
|                | 1  | ONCE OR TWICE     | 85    | 5.7%    |
|                | 2  | ONCE A MONTH      | 113   | 7.5%    |
|                | 3  | 2-3 TIMES A MONTH | 159   | 10.6%   |
|                | 4  | WEEKLY            | 131   | 8.7%    |
|                | 5  | 2-3 PER WEEK      | 144   | 9.6%    |
|                | 6  | 4+ PER WEEK       | 48    | 3.2%    |
| Missing Values | -1 | IAP               | 567   | 37.8%   |
|                | 8  | DK                | 2     | 0.1%    |
|                | 9  | NA                | 26    | 1.7%    |

**SIBS**

|                                 |                    | Value                          | Count | Percent |
|---------------------------------|--------------------|--------------------------------|-------|---------|
| Standard Attributes             | Position           | 40                             |       |         |
|                                 | Label              | Number of brothers and sisters |       |         |
|                                 | Type               | Numeric                        |       |         |
|                                 | Format             | F2                             |       |         |
|                                 | Measurement        | Scale                          |       |         |
|                                 | Role               | Input                          |       |         |
|                                 | N                  | Valid                          | 1497  |         |
| Missing                         |                    | 3                              |       |         |
| Central Tendency and Dispersion | Mean               | 3.75                           |       |         |
|                                 | Standard Deviation | 3.282                          |       |         |
|                                 | Percentile 25      | 2.00                           |       |         |
|                                 | Percentile 50      | 3.00                           |       |         |
|                                 | Percentile 75      | 5.00                           |       |         |
| Labeled Values                  | -1                 | IAP                            | 0     | 0.0%    |
|                                 | 98                 | DK                             | 1     | 0.1%    |
|                                 | 99                 | NA                             | 2     | 0.1%    |

**THNKSELF**

|                     |             | Value                | Count | Percent |
|---------------------|-------------|----------------------|-------|---------|
| Standard Attributes | Position    | 41                   |       |         |
|                     | Label       | To think for oneself |       |         |
|                     | Type        | Numeric              |       |         |
|                     | Format      | F1                   |       |         |
|                     | Measurement | Nominal              |       |         |
|                     | Role        | Input                |       |         |

|                |   | Value           | Count | Percent |
|----------------|---|-----------------|-------|---------|
| Valid Values   | 1 | MOST IMPORTANT  | 439   | 29.3%   |
|                | 2 | 2ND IMPORTANT   | 167   | 11.1%   |
|                | 3 | 3RD IMPORTANT   | 189   | 12.6%   |
|                | 4 | 4TH IMPORTANT   | 174   | 11.6%   |
|                | 5 | LEAST IMPORTANT | 47    | 3.1%    |
| Missing Values | 0 | IAP             | 473   | 31.5%   |
|                | 8 | DK              | 0     | 0.0%    |
|                | 9 | NA              | 11    | 0.7%    |

### WORKHARD

|                     |             | Value           | Count | Percent |
|---------------------|-------------|-----------------|-------|---------|
| Standard Attributes | Position    | 42              |       |         |
|                     | Label       | To work hard    |       |         |
|                     | Type        | Numeric         |       |         |
|                     | Format      | F1              |       |         |
|                     | Measurement | Nominal         |       |         |
|                     | Role        | Input           |       |         |
| Valid Values        | 1           | MOST IMPORTANT  | 264   | 17.6%   |
|                     | 2           | 2ND IMPORTANT   | 377   | 25.1%   |
|                     | 3           | 3RD IMPORTANT   | 281   | 18.7%   |
|                     | 4           | 4TH IMPORTANT   | 82    | 5.5%    |
|                     | 5           | LEAST IMPORTANT | 12    | 0.8%    |
| Missing Values      | 0           | IAP             | 473   | 31.5%   |
|                     | 8           | DK              | 0     | 0.0%    |
|                     | 9           | NA              | 11    | 0.7%    |

### XMOVIE

|                     |             | Value                           | Count | Percent |
|---------------------|-------------|---------------------------------|-------|---------|
| Standard Attributes | Position    | 43                              |       |         |
|                     | Label       | Seen X-rated movie in last year |       |         |
|                     | Type        | Numeric                         |       |         |
|                     | Format      | F1                              |       |         |
|                     | Measurement | Nominal                         |       |         |
|                     | Role        | Input                           |       |         |
| Valid Values        | 1           | YES                             | 278   | 18.5%   |
|                     | 2           | NO                              | 745   | 49.7%   |
| Missing Values      | 0           | IAP                             | 473   | 31.5%   |
|                     | 8           | DK                              | 0     | 0.0%    |
|                     | 9           | NA                              | 4     | 0.3%    |

## SUBSAMPLE 2: EXER.SAV

EXER.SAV is used primarily in the exercises at the end of the chapters. This subsample contains 1,500 cases and 46 variables drawn from the 2016 General Social Survey (GSS).

### AFFRMACT

|                     |             | Value                             | Count | Percent |
|---------------------|-------------|-----------------------------------|-------|---------|
| Standard Attributes | Position    | 1                                 |       |         |
|                     | Label       | Favor preference in hiring Blacks |       |         |
|                     | Type        | Numeric                           |       |         |
|                     | Format      | F1                                |       |         |
|                     | Measurement | Nominal                           |       |         |
|                     | Role        | Input                             |       |         |
| Valid Values        | 1           | STRONGLY SUPPORT PREF             | 143   | 9.5%    |
|                     | 2           | SUPPORT PREF                      | 66    | 4.4%    |
|                     | 3           | OPPOSE PREF                       | 300   | 20.0%   |
|                     | 4           | STRONGLY OPPOSE PREF              | 424   | 28.3%   |
| Missing Values      | 0           | IAP                               | 511   | 34.1%   |
|                     | 8           | DK                                | 41    | 2.7%    |
|                     | 9           | NA                                | 15    | 1.0%    |

### AGE

|                                 |                    | Value             | Count | Percent |
|---------------------------------|--------------------|-------------------|-------|---------|
| Standard Attributes             | Position           | 2                 |       |         |
|                                 | Label              | Age of respondent |       |         |
|                                 | Type               | Numeric           |       |         |
|                                 | Format             | F2                |       |         |
|                                 | Measurement        | Scale             |       |         |
|                                 | Role               | Input             |       |         |
| N                               | Valid              | 1495              |       |         |
|                                 | Missing            | 5                 |       |         |
| Central Tendency and Dispersion | Mean               | 49.16             |       |         |
|                                 | Standard Deviation | 17.476            |       |         |
|                                 | Percentile 25      | 34.00             |       |         |
|                                 | Percentile 50      | 50.00             |       |         |
|                                 | Percentile 75      | 62.00             |       |         |
| Labeled Values                  | 89                 | 89 OR OLDER       | 7     | 0.5%    |
|                                 | 98                 | DK                | 0     | 0.0%    |
|                                 | 99                 | NA                | 5     | 0.3%    |

**CLASS**

|                     |             | Value                           | Count | Percent |
|---------------------|-------------|---------------------------------|-------|---------|
| Standard Attributes | Position    | 3                               |       |         |
|                     | Label       | Subjective class identification |       |         |
|                     | Type        | Numeric                         |       |         |
|                     | Format      | F1                              |       |         |
|                     | Measurement | Nominal                         |       |         |
|                     | Role        | Input                           |       |         |
| Valid Values        | 1           | LOWER CLASS                     | 148   | 9.9%    |
|                     | 2           | WORKING CLASS                   | 687   | 45.8%   |
|                     | 3           | MIDDLE CLASS                    | 608   | 40.5%   |
|                     | 4           | UPPER CLASS                     | 44    | 2.9%    |
|                     | 5           | NO CLASS                        | 0     | 0.0%    |
| Missing Values      | 0           | IAP                             | 0     | 0.0%    |
|                     | 8           | DK                              | 9     | 0.6%    |
|                     | 9           | NA                              | 4     | 0.3%    |

**COLATH**

|                     |             | Value                          | Count | Percent |
|---------------------|-------------|--------------------------------|-------|---------|
| Standard Attributes | Position    | 4                              |       |         |
|                     | Label       | Allow antireligionist to teach |       |         |
|                     | Type        | Numeric                        |       |         |
|                     | Format      | F1                             |       |         |
|                     | Measurement | Nominal                        |       |         |
|                     | Role        | Input                          |       |         |
| Valid Values        | 4           | ALLOWED                        | 648   | 43.2%   |
|                     | 5           | NOT ALLOWED                    | 310   | 20.7%   |
| Missing Values      | 0           | IAP                            | 516   | 34.4%   |
|                     | 8           | DK                             | 21    | 1.4%    |
|                     | 9           | NA                             | 5     | 0.3%    |

**COLCOM**

|                     |             | Value                             | Count | Percent |
|---------------------|-------------|-----------------------------------|-------|---------|
| Standard Attributes | Position    | 5                                 |       |         |
|                     | Label       | Should communist teacher be fired |       |         |
|                     | Type        | Numeric                           |       |         |
|                     | Format      | F1                                |       |         |
|                     | Measurement | Nominal                           |       |         |
|                     | Role        | Input                             |       |         |

(Continued)

(Continued)

|                |   | Value     | Count | Percent |
|----------------|---|-----------|-------|---------|
| Valid Values   | 4 | FIRED     | 294   | 19.6%   |
|                | 5 | NOT FIRED | 639   | 42.6%   |
| Missing Values | 0 | IAP       | 516   | 34.4%   |
|                | 8 | DK        | 43    | 2.9%    |
|                | 9 | NA        | 8     | 0.5%    |

**COLHOMO**

|                     |             | Value                     | Count | Percent |
|---------------------|-------------|---------------------------|-------|---------|
| Standard Attributes | Position    | 6                         |       |         |
|                     | Label       | Allow homosexual to teach |       |         |
|                     | Type        | Numeric                   |       |         |
|                     | Format      | F1                        |       |         |
|                     | Measurement | Nominal                   |       |         |
|                     | Role        | Input                     |       |         |
| Valid Values        | 4           | ALLOWED                   | 868   | 57.9%   |
|                     | 5           | NOT ALLOWED               | 97    | 6.5%    |
| Missing Values      | 0           | IAP                       | 516   | 34.4%   |
|                     | 8           | DK                        | 15    | 1.0%    |
|                     | 9           | NA                        | 4     | 0.3%    |

**COLRAC**

|                     |             | Value                 | Count | Percent |
|---------------------|-------------|-----------------------|-------|---------|
| Standard Attributes | Position    | 7                     |       |         |
|                     | Label       | Allow racist to teach |       |         |
|                     | Type        | Numeric               |       |         |
|                     | Format      | F1                    |       |         |
|                     | Measurement | Nominal               |       |         |
|                     | Role        | Input                 |       |         |
| Valid Values        | 4           | ALLOWED               | 430   | 28.7%   |
|                     | 5           | NOT ALLOWED           | 532   | 35.5%   |
| Missing Values      | 0           | IAP                   | 516   | 34.4%   |
|                     | 8           | DK                    | 18    | 1.2%    |
|                     | 9           | NA                    | 4     | 0.3%    |

**CONPRESS**

|                     |          | Value               | Count | Percent |
|---------------------|----------|---------------------|-------|---------|
| Standard Attributes | Position | 8                   |       |         |
|                     | Label    | Confidence in press |       |         |



|                |             | Value        | Count | Percent |
|----------------|-------------|--------------|-------|---------|
| Valid Values   | Type        | Numeric      |       |         |
|                | Format      | F1           |       |         |
|                | Measurement | Nominal      |       |         |
|                | Role        | Input        |       |         |
| Missing Values | 1           | A GREAT DEAL | 79    | 5.3%    |
|                | 2           | ONLY SOME    | 407   | 27.1%   |
|                | 3           | HARDLY ANY   | 529   | 35.3%   |
|                | 0           | IAP          | 473   | 31.5%   |
|                | 8           | DK           | 10    | 0.7%    |
|                | 9           | NA           | 2     | 0.1%    |

**CONTV**

|                     |                | Value                    | Count | Percent |
|---------------------|----------------|--------------------------|-------|---------|
| Standard Attributes | Position       | 9                        |       |         |
|                     | Label          | Confidence in television |       |         |
|                     | Type           | Numeric                  |       |         |
|                     | Format         | F1                       |       |         |
| Valid Values        | Measurement    | Nominal                  |       |         |
|                     | Role           | Input                    |       |         |
|                     | 1              | A GREAT DEAL             | 95    | 6.3%    |
|                     | 2              | ONLY SOME                | 487   | 32.5%   |
|                     | 3              | HARDLY ANY               | 435   | 29.0%   |
|                     | Missing Values | 0                        | IAP   | 473     |
| 8                   |                | DK                       | 7     | 0.5%    |
| 9                   |                | NA                       | 3     | 0.2%    |

**DISCAFF**

|                     |             | Value                      | Count | Percent |
|---------------------|-------------|----------------------------|-------|---------|
| Standard Attributes | Position    | 10                         |       |         |
|                     | Label       | Whites hurt by aff. action |       |         |
|                     | Type        | Numeric                    |       |         |
|                     | Format      | F1                         |       |         |
| Valid Values        | Measurement | Nominal                    |       |         |
|                     | Role        | Input                      |       |         |
|                     | 1           | VERY LIKELY                | 120   | 8.0%    |
|                     | 2           | SOMEWHAT LIKELY            | 410   | 27.3%   |
|                     | 3           | NOT VERY LIKELY            | 417   | 27.8%   |

(Continued)

(Continued)

|                |   | Value     | Count | Percent |
|----------------|---|-----------|-------|---------|
| Missing Values | 0 | IAP       | 517   | 34.5%   |
|                | 8 | DONT KNOW | 27    | 1.8%    |
|                | 9 | NA        | 9     | 0.6%    |

**EDUC**

|                     |                | Value                            | Count | Percent |
|---------------------|----------------|----------------------------------|-------|---------|
| Standard Attributes | Position       | 11                               |       |         |
|                     | Label          | Highest year of school completed |       |         |
|                     | Type           | Numeric                          |       |         |
|                     | Format         | F2                               |       |         |
|                     | Measurement    | Nominal                          |       |         |
|                     | Role           | Input                            |       |         |
| Valid Values        | 0              |                                  | 1     | 0.1%    |
|                     | 3              |                                  | 2     | 0.1%    |
|                     | 4              |                                  | 1     | 0.1%    |
|                     | 5              |                                  | 1     | 0.1%    |
|                     | 6              |                                  | 12    | 0.8%    |
|                     | 7              |                                  | 10    | 0.7%    |
|                     | 8              |                                  | 23    | 1.5%    |
|                     | 9              |                                  | 28    | 1.9%    |
|                     | 10             |                                  | 41    | 2.7%    |
|                     | 11             |                                  | 61    | 4.1%    |
|                     | 12             |                                  | 427   | 28.5%   |
|                     | 13             |                                  | 131   | 8.7%    |
|                     | 14             |                                  | 193   | 12.9%   |
|                     | 15             |                                  | 77    | 5.1%    |
|                     | 16             |                                  | 266   | 17.7%   |
|                     | 17             |                                  | 61    | 4.1%    |
|                     | 18             |                                  | 74    | 4.9%    |
|                     | 19             |                                  | 26    | 1.7%    |
|                     | 20             |                                  | 58    | 3.9%    |
|                     | Missing Values | 97                               | IAP   | 0       |
| 98                  |                | DK                               | 1     | 0.1%    |
| 99                  |                | NA                               | 6     | 0.4%    |

**EVSTRAY**

|                     |             | Value                                    | Count | Percent |
|---------------------|-------------|------------------------------------------|-------|---------|
| Standard Attributes | Position    | 12                                       |       |         |
|                     | Label       | Have sex other than spouse while married |       |         |
|                     | Type        | Numeric                                  |       |         |
|                     | Format      | F1                                       |       |         |
|                     | Measurement | Nominal                                  |       |         |
|                     | Role        | Input                                    |       |         |
| Valid Values        | 1           | YES                                      | 122   | 8.1%    |
|                     | 2           | NO                                       | 537   | 35.8%   |
|                     | 3           | NEVER MARRIED                            | 257   | 17.1%   |
| Missing Values      | 0           | IAP                                      | 567   | 37.8%   |
|                     | 8           | DK                                       | 0     | 0.0%    |
|                     | 9           | NA                                       | 17    | 1.1%    |

**FECHLD**

|                     |             | Value                                | Count | Percent |
|---------------------|-------------|--------------------------------------|-------|---------|
| Standard Attributes | Position    | 13                                   |       |         |
|                     | Label       | Mother working doesn't hurt children |       |         |
|                     | Type        | Numeric                              |       |         |
|                     | Format      | F1                                   |       |         |
|                     | Measurement | Nominal                              |       |         |
|                     | Role        | Input                                |       |         |
| Valid Values        | 1           | STRONGLY AGREE                       | 357   | 23.8%   |
|                     | 2           | AGREE                                | 408   | 27.2%   |
|                     | 3           | DISAGREE                             | 183   | 12.2%   |
|                     | 4           | STRONGLY DISAGREE                    | 36    | 2.4%    |
| Missing Values      | 0           | IAP                                  | 511   | 34.1%   |
|                     | 8           | DK                                   | 5     | 0.3%    |
|                     | 9           | NA                                   | 0     | 0.0%    |

**FEFAM**

|                     |          | Value                                   | Count | Percent |
|---------------------|----------|-----------------------------------------|-------|---------|
| Standard Attributes | Position | 14                                      |       |         |
|                     | Label    | Better for man to work, woman tend home |       |         |

(Continued)

(Continued)

|                |             | Value             | Count | Percent |
|----------------|-------------|-------------------|-------|---------|
| Valid Values   | Type        | Numeric           |       |         |
|                | Format      | F1                |       |         |
|                | Measurement | Nominal           |       |         |
|                | Role        | Input             |       |         |
|                | 1           | STRONGLY AGREE    | 50    | 3.3%    |
|                | 2           | AGREE             | 202   | 13.5%   |
| Missing Values | 3           | DISAGREE          | 465   | 31.0%   |
|                | 4           | STRONGLY DISAGREE | 264   | 17.6%   |
|                | 0           | IAP               | 511   | 34.1%   |
|                | 8           | DK                | 8     | 0.5%    |
|                | 9           | NA                | 0     | 0.0%    |

**FEHIRE**

|                     |             | Value                         | Count | Percent |
|---------------------|-------------|-------------------------------|-------|---------|
| Standard Attributes | Position    | 15                            |       |         |
|                     | Label       | Should hire and promote women |       |         |
|                     | Type        | Numeric                       |       |         |
|                     | Format      | F1                            |       |         |
|                     | Measurement | Nominal                       |       |         |
|                     | Role        | Input                         |       |         |
| Valid Values        | 1           | STRONGLY AGREE                | 120   | 8.0%    |
|                     | 2           | AGREE                         | 256   | 17.1%   |
|                     | 3           | NEITHER AGREE NOR DISAGREE    | 48    | 3.2%    |
|                     | 4           | DISAGREE                      | 67    | 4.5%    |
|                     | 5           | STRONGLY DISAGREE             | 14    | 0.9%    |
| Missing Values      | 0           | IAP                           | 995   | 66.3%   |
|                     | 8           | DONT KNOW                     | 0     | 0.0%    |
|                     | 9           | NA                            | 0     | 0.0%    |

**FEPRESCH**

|                     |          | Value                                 | Count | Percent |
|---------------------|----------|---------------------------------------|-------|---------|
| Standard Attributes | Position | 16                                    |       |         |
|                     | Label    | Preschool kids suffer if mother works |       |         |
|                     | Type     | Numeric                               |       |         |
|                     | Format   | F1                                    |       |         |

|                |             | Value             | Count | Percent |
|----------------|-------------|-------------------|-------|---------|
| Valid Values   | Measurement | Nominal           |       |         |
|                | Role        | Input             |       |         |
|                | 1           | STRONGLY AGREE    | 32    | 2.1%    |
|                | 2           | AGREE             | 218   | 14.5%   |
|                | 3           | DISAGREE          | 539   | 35.9%   |
| Missing Values | 4           | STRONGLY DISAGREE | 194   | 12.9%   |
|                | 0           | IAP               | 511   | 34.1%   |
|                | 8           | DK                | 6     | 0.4%    |
|                | 9           | NA                | 0     | 0.0%    |

**GRASS**

|                     |             | Value                          | Count | Percent |
|---------------------|-------------|--------------------------------|-------|---------|
| Standard Attributes | Position    | 17                             |       |         |
|                     | Label       | Should marijuana be made legal |       |         |
|                     | Type        | Numeric                        |       |         |
|                     | Format      | F1                             |       |         |
|                     | Measurement | Nominal                        |       |         |
|                     | Role        | Input                          |       |         |
| Valid Values        | 1           | LEGAL                          | 589   | 39.3%   |
|                     | 2           | NOT LEGAL                      | 375   | 25.0%   |
| Missing Values      | 0           | IAP                            | 473   | 31.5%   |
|                     | 8           | DK                             | 61    | 4.1%    |
|                     | 9           | NA                             | 2     | 0.1%    |

**HEALTH**

|                     |             | Value               | Count | Percent |
|---------------------|-------------|---------------------|-------|---------|
| Standard Attributes | Position    | 18                  |       |         |
|                     | Label       | Condition of health |       |         |
|                     | Type        | Numeric             |       |         |
|                     | Format      | F1                  |       |         |
|                     | Measurement | Nominal             |       |         |
|                     | Role        | Input               |       |         |
| Valid Values        | 1           | EXCELLENT           | 230   | 15.3%   |
|                     | 2           | GOOD                | 482   | 32.1%   |
|                     | 3           | FAIR                | 205   | 13.7%   |
|                     | 4           | POOR                | 62    | 4.1%    |
| Missing Values      | 0           | IAP                 | 518   | 34.5%   |
|                     | 8           | DK                  | 0     | 0.0%    |
|                     | 9           | NA                  | 3     | 0.2%    |

### HISPANIC

|                                 |                      | Value                                | Count | Percent |
|---------------------------------|----------------------|--------------------------------------|-------|---------|
| Standard Attributes             | Position             | 19                                   |       |         |
|                                 | Label                | Hispanic specified                   |       |         |
|                                 | Type                 | Numeric                              |       |         |
|                                 | Format               | F2                                   |       |         |
|                                 | Measurement          | Scale                                |       |         |
|                                 | Role                 | Input                                |       |         |
| N                               | Valid                | 1499                                 |       |         |
|                                 | Missing              | 1                                    |       |         |
| Central Tendency and Dispersion | Mean                 | 1.87                                 |       |         |
|                                 | Standard Deviation   | 4.690                                |       |         |
|                                 | Percentile 25        | 1.00                                 |       |         |
|                                 | Percentile 50        | 1.00                                 |       |         |
|                                 | Percentile 75        | 1.00                                 |       |         |
| Labeled Values                  | 0                    | IAP                                  | 0     | 0.0%    |
|                                 | 1                    | NOT HISPANIC                         | 1312  | 87.5%   |
|                                 | 2                    | MEXICAN, MEXICAN AMERICAN, CHICANO/A | 99    | 6.6%    |
|                                 | 3                    | PUERTO RICAN                         | 22    | 1.5%    |
|                                 | 4                    | CUBAN                                | 10    | 0.7%    |
|                                 | 5                    | SALVADORIAN                          | 7     | 0.5%    |
|                                 | 6                    | GUATEMALAN                           | 5     | 0.3%    |
|                                 | 7                    | PANAMANIAN                           | 2     | 0.1%    |
|                                 | 8                    | NICARAGUAN                           | 1     | 0.1%    |
|                                 | 9                    | COSTA RICAN                          | 0     | 0.0%    |
|                                 | 10                   | CENTRAL AMERICAN                     | 3     | 0.2%    |
|                                 | 11                   | HONDURAN                             | 4     | 0.3%    |
|                                 | 15                   | DOMINICAN                            | 6     | 0.4%    |
|                                 | 16                   | WEST INDIAN                          | 0     | 0.0%    |
|                                 | 20                   | PERUVIAN                             | 1     | 0.1%    |
|                                 | 21                   | EQUADORIAN                           | 0     | 0.0%    |
|                                 | 22                   | COLUMBIAN                            | 1     | 0.1%    |
|                                 | 23                   | VENEZUELAN                           | 1     | 0.1%    |
|                                 | 24                   | Argentinian                          | 2     | 0.1%    |
|                                 | 25                   | Chilean                              | 0     | 0.0%    |
|                                 | 30                   | SPANISH                              | 14    | 0.9%    |
|                                 | 31                   | BASQUE                               | 0     | 0.0%    |
|                                 | 35                   | FILIPINO/A                           | 1     | 0.1%    |
|                                 | 40                   | LATIN AMERICAN                       | 0     | 0.0%    |
|                                 | 41                   | SOUTH AMERICAN                       | 1     | 0.1%    |
|                                 | 42                   | American                             | 1     | 0.1%    |
|                                 | 45                   | LATIN                                | 0     | 0.0%    |
|                                 | 46                   | LATINO/A                             | 2     | 0.1%    |
| 47                              | HISPANIC             | 2                                    | 0.1%  |         |
| 50                              | OTHER, NOT SPECIFIED | 2                                    | 0.1%  |         |
| 98                              | DK                   | 0                                    | 0.0%  |         |
| 99                              | NA                   | 1                                    | 0.1%  |         |

**INCOME**

|                     |             | Value               | Count | Percent |
|---------------------|-------------|---------------------|-------|---------|
| Standard Attributes | Position    | 20                  |       |         |
|                     | Label       | Total family income |       |         |
|                     | Type        | Numeric             |       |         |
|                     | Format      | F2                  |       |         |
|                     | Measurement | Nominal             |       |         |
|                     | Role        | Input               |       |         |
| Valid Values        | 1           | LT \$1000           | 32    | 2.1%    |
|                     | 2           | \$1000 TO 2999      | 22    | 1.5%    |
|                     | 3           | \$3000 TO 3999      | 9     | 0.6%    |
|                     | 4           | \$4000 TO 4999      | 3     | 0.2%    |
|                     | 5           | \$5000 TO 5999      | 9     | 0.6%    |
|                     | 6           | \$6000 TO 6999      | 8     | 0.5%    |
|                     | 7           | \$7000 TO 7999      | 6     | 0.4%    |
|                     | 8           | \$8000 TO 9999      | 24    | 1.6%    |
|                     | 9           | \$10000 – 14999     | 85    | 5.7%    |
|                     | 10          | \$15000 – 19999     | 52    | 3.5%    |
|                     | 11          | \$20000 – 24999     | 108   | 7.2%    |
|                     | 12          | \$25000 OR MORE     | 919   | 61.3%   |
| Missing Values      | 0           | IAP                 | 0     | 0.0%    |
|                     | 13          | REFUSED             | 156   | 10.4%   |
|                     | 98          | DK                  | 67    | 4.5%    |
|                     | 99          | NA                  | 0     | 0.0%    |

**MAEDUC**

|                                 |                    | Value                                 | Count | Percent |
|---------------------------------|--------------------|---------------------------------------|-------|---------|
| Standard Attributes             | Position           | 21                                    |       |         |
|                                 | Label              | Highest year school completed, mother |       |         |
|                                 | Type               | Numeric                               |       |         |
|                                 | Format             | F2                                    |       |         |
|                                 | Measurement        | Scale                                 |       |         |
|                                 | Role               | Input                                 |       |         |
| N                               | Valid              | 1355                                  |       |         |
|                                 | Missing            | 145                                   |       |         |
| Central Tendency and Dispersion | Mean               | 11.99                                 |       |         |
|                                 | Standard Deviation | 3.648                                 |       |         |
|                                 | Percentile 25      | 11.00                                 |       |         |
|                                 | Percentile 50      | 12.00                                 |       |         |
|                                 | Percentile 75      | 14.00                                 |       |         |

(Continued)

(Continued)

|                |    | Value | Count | Percent |
|----------------|----|-------|-------|---------|
| Labeled Values | 97 | IAP   | 56    | 3.7%    |
|                | 98 | DK    | 86    | 5.7%    |
|                | 99 | NA    | 3     | 0.2%    |

### MARITAL

|                     |             | Value          | Count | Percent |
|---------------------|-------------|----------------|-------|---------|
| Standard Attributes | Position    | 22             |       |         |
|                     | Label       | Marital status |       |         |
|                     | Type        | Numeric        |       |         |
|                     | Format      | F1             |       |         |
|                     | Measurement | Nominal        |       |         |
|                     | Role        | Input          |       |         |
| Valid Values        | 1           | MARRIED        | 644   | 42.9%   |
|                     | 2           | WIDOWED        | 136   | 9.1%    |
|                     | 3           | DIVORCED       | 259   | 17.3%   |
|                     | 4           | SEPARATED      | 68    | 4.5%    |
|                     | 5           | NEVER MARRIED  | 392   | 26.1%   |
| Missing Values      | 9           | NA             | 1     | 0.1%    |

### NATCRIME

|                     |             | Value                     | Count | Percent |
|---------------------|-------------|---------------------------|-------|---------|
| Standard Attributes | Position    | 23                        |       |         |
|                     | Label       | Halting rising crime rate |       |         |
|                     | Type        | Numeric                   |       |         |
|                     | Format      | F1                        |       |         |
|                     | Measurement | Nominal                   |       |         |
|                     | Role        | Input                     |       |         |
| Valid Values        | 1           | TOO LITTLE                | 491   | 32.7%   |
|                     | 2           | ABOUT RIGHT               | 184   | 12.3%   |
|                     | 3           | TOO MUCH                  | 46    | 3.1%    |
| Missing Values      | 0           | IAP                       | 756   | 50.4%   |
|                     | 8           | DK                        | 20    | 1.3%    |
|                     | 9           | NA                        | 3     | 0.2%    |

### NATDRUG

|                     |          | Value                       | Count | Percent |
|---------------------|----------|-----------------------------|-------|---------|
| Standard Attributes | Position | 24                          |       |         |
|                     | Label    | Dealing with drug addiction |       |         |
|                     | Type     | Numeric                     |       |         |



|                     |             | Value       | Count | Percent |
|---------------------|-------------|-------------|-------|---------|
| Standard Attributes | Position    | 24          |       |         |
|                     | Format      | F1          |       |         |
|                     | Measurement | Nominal     |       |         |
|                     | Role        | Input       |       |         |
| Valid Values        | 1           | TOO LITTLE  | 459   | 30.6%   |
|                     | 2           | ABOUT RIGHT | 204   | 13.6%   |
|                     | 3           | TOO MUCH    | 63    | 4.2%    |
| Missing Values      | 0           | IAP         | 756   | 50.4%   |
|                     | 8           | DK          | 16    | 1.1%    |
|                     | 9           | NA          | 2     | 0.1%    |

### NATEDUC

|                     |             | Value                              | Count | Percent |
|---------------------|-------------|------------------------------------|-------|---------|
| Standard Attributes | Position    | 25                                 |       |         |
|                     | Label       | Improving nations education system |       |         |
|                     | Type        | Numeric                            |       |         |
|                     | Format      | F1                                 |       |         |
|                     | Measurement | Nominal                            |       |         |
|                     | Role        | Input                              |       |         |
| Valid Values        | 1           | TOO LITTLE                         | 525   | 35.0%   |
|                     | 2           | ABOUT RIGHT                        | 163   | 10.9%   |
|                     | 3           | TOO MUCH                           | 48    | 3.2%    |
| Missing Values      | 0           | IAP                                | 756   | 50.4%   |
|                     | 8           | DK                                 | 7     | 0.5%    |
|                     | 9           | NA                                 | 1     | 0.1%    |

### NATFARE

|                     |             | Value       | Count | Percent |
|---------------------|-------------|-------------|-------|---------|
| Standard Attributes | Position    | 26          |       |         |
|                     | Label       | Welfare     |       |         |
|                     | Type        | Numeric     |       |         |
|                     | Format      | F1          |       |         |
|                     | Measurement | Nominal     |       |         |
|                     | Role        | Input       |       |         |
| Valid Values        | 1           | TOO LITTLE  | 151   | 10.1%   |
|                     | 2           | ABOUT RIGHT | 241   | 16.1%   |
|                     | 3           | TOO MUCH    | 323   | 21.5%   |
| Missing Values      | 0           | IAP         | 756   | 50.4%   |
|                     | 8           | DK          | 26    | 1.7%    |
|                     | 9           | NA          | 3     | 0.2%    |

### NATHEAL

|                     |              | Value                                  | Count      | Percent |
|---------------------|--------------|----------------------------------------|------------|---------|
| Standard Attributes | Position     | 27                                     |            |         |
|                     | Label        | Improving & protecting nation's health |            |         |
|                     | Type         | Numeric                                |            |         |
|                     | Format       | F1                                     |            |         |
|                     | Measurement  | Nominal                                |            |         |
|                     | Role         | Input                                  |            |         |
|                     | Valid Values | 1                                      | TOO LITTLE | 470     |
|                     | 2            | ABOUT RIGHT                            | 189        | 12.6%   |
|                     | 3            | TOO MUCH                               | 72         | 4.8%    |
| Missing Values      | 0            | IAP                                    | 756        | 50.4%   |
|                     | 8            | DK                                     | 10         | 0.7%    |
|                     | 9            | NA                                     | 3          | 0.2%    |

### NATRACE

|                     |              | Value                              | Count      | Percent |
|---------------------|--------------|------------------------------------|------------|---------|
| Standard Attributes | Position     | 28                                 |            |         |
|                     | Label        | Improving the conditions of Blacks |            |         |
|                     | Type         | Numeric                            |            |         |
|                     | Format       | F1                                 |            |         |
|                     | Measurement  | Nominal                            |            |         |
|                     | Role         | Input                              |            |         |
|                     | Valid Values | 1                                  | TOO LITTLE | 344     |
|                     | 2            | ABOUT RIGHT                        | 254        | 16.9%   |
|                     | 3            | TOO MUCH                           | 80         | 5.3%    |
| Missing Values      | 0            | IAP                                | 756        | 50.4%   |
|                     | 8            | DK                                 | 56         | 3.7%    |
|                     | 9            | NA                                 | 10         | 0.7%    |

### NEWS

|                     |             | Value                           | Count | Percent |
|---------------------|-------------|---------------------------------|-------|---------|
| Standard Attributes | Position    | 29                              |       |         |
|                     | Label       | How often does R read newspaper |       |         |
|                     | Type        | Numeric                         |       |         |
|                     | Format      | F1                              |       |         |
|                     | Measurement | Nominal                         |       |         |
|                     | Role        | Input                           |       |         |

|                |   | Value             | Count | Percent |
|----------------|---|-------------------|-------|---------|
| Valid Values   | 1 | EVERY DAY         | 222   | 14.8%   |
|                | 2 | FEW TIMES A WEEK  | 136   | 9.1%    |
|                | 3 | ONCE A WEEK       | 109   | 7.3%    |
|                | 4 | LESS THAN ONCE WK | 164   | 10.9%   |
|                | 5 | NEVER             | 356   | 23.7%   |
| Missing Values | 0 | IAP               | 512   | 34.1%   |
|                | 8 | DK                | 0     | 0.0%    |
|                | 9 | NA                | 1     | 0.1%    |

### PAEDUC

|                                 |                    | Value                                 | Count | Percent |
|---------------------------------|--------------------|---------------------------------------|-------|---------|
| Standard Attributes             | Position           | 30                                    |       |         |
|                                 | Label              | Highest year school completed, father |       |         |
|                                 | Type               | Numeric                               |       |         |
|                                 | Format             | F2                                    |       |         |
|                                 | Measurement        | Scale                                 |       |         |
|                                 | Role               | Input                                 |       |         |
| N                               | Valid              | 1110                                  |       |         |
|                                 | Missing            | 390                                   |       |         |
| Central Tendency and Dispersion | Mean               | 11.86                                 |       |         |
|                                 | Standard Deviation | 4.015                                 |       |         |
|                                 | Percentile 25      | 10.00                                 |       |         |
|                                 | Percentile 50      | 12.00                                 |       |         |
|                                 | Percentile 75      | 14.00                                 |       |         |
| Labeled Values                  | 97                 | IAP                                   | 274   | 18.3%   |
|                                 | 98                 | DK                                    | 113   | 7.5%    |
|                                 | 99                 | NA                                    | 3     | 0.2%    |

### PARTNERS

|                     |             | Value                                    | Count | Percent |
|---------------------|-------------|------------------------------------------|-------|---------|
| Standard Attributes | Position    | 31                                       |       |         |
|                     | Label       | How many sex partners R had in last year |       |         |
|                     | Type        | Numeric                                  |       |         |
|                     | Format      | F2                                       |       |         |
|                     | Measurement | Nominal                                  |       |         |
|                     | Role        | Input                                    |       |         |

(Continued)

[Continued]

|                |    | Value                  | Count | Percent |
|----------------|----|------------------------|-------|---------|
| Valid Values   | 0  | NO PARTNERS            | 206   | 13.7%   |
|                | 1  | 1 PARTNER              | 582   | 38.8%   |
|                | 2  | 2 PARTNERS             | 67    | 4.5%    |
|                | 3  | 3 PARTNERS             | 23    | 1.5%    |
|                | 4  | 4 PARTNERS             | 17    | 1.1%    |
|                | 5  | 5-10 PARTNERS          | 22    | 1.5%    |
|                | 6  | 11-20 PARTNERS         | 9     | 0.6%    |
|                | 7  | 21-100 PARTNERS        | 1     | 0.1%    |
|                | 8  | MORE THAN 100 PARTNERS | 0     | 0.0%    |
|                | 9  | 1 OR MORE, # unknown   | 5     | 0.3%    |
|                | 95 | SEVERAL                | 0     | 0.0%    |
| Missing Values | -1 | IAP                    | 567   | 37.8%   |
|                | 98 | DK                     | 0     | 0.0%    |
|                | 99 | NA                     | 1     | 0.1%    |

**PILLOK**

|                     |             | Value                            | Count | Percent |
|---------------------|-------------|----------------------------------|-------|---------|
| Standard Attributes | Position    | 32                               |       |         |
|                     | Label       | Birth control to teenagers 14-16 |       |         |
|                     | Type        | Numeric                          |       |         |
|                     | Format      | F1                               |       |         |
|                     | Measurement | Nominal                          |       |         |
|                     | Role        | Input                            |       |         |
| Valid Values        | 1           | STRONGLY AGREE                   | 264   | 17.6%   |
|                     | 2           | AGREE                            | 327   | 21.8%   |
|                     | 3           | DISAGREE                         | 224   | 14.9%   |
|                     | 4           | STRONGLY DISAGREE                | 143   | 9.5%    |
| Missing Values      | 0           | IAP                              | 511   | 34.1%   |
|                     | 8           | DK                               | 23    | 1.5%    |
|                     | 9           | NA                               | 8     | 0.5%    |

**POLABUSE**

|                     |             | Value                                 | Count | Percent |
|---------------------|-------------|---------------------------------------|-------|---------|
| Standard Attributes | Position    | 33                                    |       |         |
|                     | Label       | Citizen said vulgar or obscene things |       |         |
|                     | Type        | Numeric                               |       |         |
|                     | Format      | F1                                    |       |         |
|                     | Measurement | Nominal                               |       |         |
|                     | Role        | Input                                 |       |         |

|                |   | Value | Count | Percent |
|----------------|---|-------|-------|---------|
| Valid Values   | 1 | YES   | 95    | 6.3%    |
|                | 2 | NO    | 911   | 60.7%   |
| Missing Values | 0 | IAP   | 473   | 31.5%   |
|                | 8 | DK    | 19    | 1.3%    |
|                | 9 | NA    | 2     | 0.1%    |

**POLATTAK**

|                     |             | Value                                  | Count | Percent |
|---------------------|-------------|----------------------------------------|-------|---------|
| Standard Attributes | Position    | 34                                     |       |         |
|                     | Label       | Citizen attacking policeman with fists |       |         |
|                     | Type        | Numeric                                |       |         |
|                     | Format      | F1                                     |       |         |
|                     | Measurement | Nominal                                |       |         |
|                     | Role        | Input                                  |       |         |
| Valid Values        | 1           | YES                                    | 865   | 57.7%   |
|                     | 2           | NO                                     | 145   | 9.7%    |
| Missing Values      | 0           | IAP                                    | 473   | 31.5%   |
|                     | 8           | DK                                     | 13    | 0.9%    |
|                     | 9           | NA                                     | 4     | 0.3%    |

**POLESCAP**

|                     |             | Value                                | Count | Percent |
|---------------------|-------------|--------------------------------------|-------|---------|
| Standard Attributes | Position    | 35                                   |       |         |
|                     | Label       | Citizen attempting to escape custody |       |         |
|                     | Type        | Numeric                              |       |         |
|                     | Format      | F1                                   |       |         |
|                     | Measurement | Nominal                              |       |         |
|                     | Role        | Input                                |       |         |
| Valid Values        | 1           | YES                                  | 670   | 44.7%   |
|                     | 2           | NO                                   | 314   | 20.9%   |
| Missing Values      | 0           | IAP                                  | 473   | 31.5%   |
|                     | 8           | DK                                   | 40    | 2.7%    |
|                     | 9           | NA                                   | 3     | 0.2%    |

**POLHITOK**

|                     |          | Value                                   | Count | Percent |
|---------------------|----------|-----------------------------------------|-------|---------|
| Standard Attributes | Position | 36                                      |       |         |
|                     | Label    | Ever approve of police striking citizen |       |         |
|                     | Type     | Numeric                                 |       |         |

(Continued)

(Continued)

|                |             | Value   | Count | Percent |
|----------------|-------------|---------|-------|---------|
| Valid Values   | Format      | F1      |       |         |
|                | Measurement | Nominal |       |         |
|                | Role        | Input   |       |         |
| Missing Values | 1           | YES     | 689   | 45.9%   |
|                | 2           | NO      | 298   | 19.9%   |
|                | 0           | IAP     | 473   | 31.5%   |
|                | 8           | DK      | 37    | 2.5%    |
|                | 9           | NA      | 3     | 0.2%    |

**POLMURDR**

|                     |             | Value                                | Count | Percent |
|---------------------|-------------|--------------------------------------|-------|---------|
| Standard Attributes | Position    | 37                                   |       |         |
|                     | Label       | Citizen questioned as murder suspect |       |         |
|                     | Type        | Numeric                              |       |         |
|                     | Format      | F1                                   |       |         |
|                     | Measurement | Nominal                              |       |         |
|                     | Role        | Input                                |       |         |
| Valid Values        | 1           | YES                                  | 155   | 10.3%   |
|                     | 2           | NO                                   | 843   | 56.2%   |
| Missing Values      | 0           | IAP                                  | 473   | 31.5%   |
|                     | 8           | DK                                   | 25    | 1.7%    |
|                     | 9           | NA                                   | 4     | 0.3%    |

**PORNLAW**

|                     |             | Value                           | Count | Percent |
|---------------------|-------------|---------------------------------|-------|---------|
| Standard Attributes | Position    | 38                              |       |         |
|                     | Label       | Feelings about pornography laws |       |         |
|                     | Type        | Numeric                         |       |         |
|                     | Format      | F1                              |       |         |
|                     | Measurement | Nominal                         |       |         |
|                     | Role        | Input                           |       |         |
| Valid Values        | 1           | ILLEGAL TO ALL                  | 335   | 22.3%   |
|                     | 2           | ILLEGAL UNDER 18                | 637   | 42.5%   |
|                     | 3           | LEGAL                           | 43    | 2.9%    |
| Missing Values      | 0           | IAP                             | 473   | 31.5%   |
|                     | 8           | DK                              | 7     | 0.5%    |
|                     | 9           | NA                              | 5     | 0.3%    |

**RACE**

|                     |             | Value              | Count | Percent |
|---------------------|-------------|--------------------|-------|---------|
| Standard Attributes | Position    | 39                 |       |         |
|                     | Label       | Race of respondent |       |         |
|                     | Type        | Numeric            |       |         |
|                     | Format      | F1                 |       |         |
|                     | Measurement | Nominal            |       |         |
|                     | Role        | Input              |       |         |
| Valid Values        | 1           | WHITE              | 1105  | 73.7%   |
|                     | 2           | BLACK              | 250   | 16.7%   |
|                     | 3           | OTHER              | 145   | 9.7%    |
| Missing Values      | 0           | IAP                | 0     | 0.0%    |

**RACWORK**

|                     |             | Value                      | Count | Percent |
|---------------------|-------------|----------------------------|-------|---------|
| Standard Attributes | Position    | 40                         |       |         |
|                     | Label       | Racial makeup of workplace |       |         |
|                     | Type        | Numeric                    |       |         |
|                     | Format      | F1                         |       |         |
|                     | Measurement | Nominal                    |       |         |
|                     | Role        | Input                      |       |         |
| Valid Values        | 1           | ALL WHITE                  | 106   | 7.1%    |
|                     | 2           | MOSTLY WHITE               | 256   | 17.1%   |
|                     | 3           | HALF WHITE-<br>BLACK       | 174   | 11.6%   |
|                     | 4           | MOSTLY BLACK               | 24    | 1.6%    |
|                     | 5           | ALL BLACK                  | 7     | 0.5%    |
|                     | 6           | WORKS ALONE                | 0     | 0.0%    |
| Missing Values      | 0           | IAP                        | 908   | 60.5%   |
|                     | 8           | DON'T KNOW                 | 14    | 0.9%    |
|                     | 9           | NA                         | 11    | 0.7%    |

**RINCOM16**

|                     |             | Value               | Count | Percent |
|---------------------|-------------|---------------------|-------|---------|
| Standard Attributes | Position    | 41                  |       |         |
|                     | Label       | Respondent's income |       |         |
|                     | Type        | Numeric             |       |         |
|                     | Format      | F8                  |       |         |
|                     | Measurement | Scale               |       |         |
|                     | Role        | Input               |       |         |

(Continued)

(Continued)

|                                 |                    | Value                | Count | Percent |
|---------------------------------|--------------------|----------------------|-------|---------|
| N                               | Valid              | 860                  |       |         |
|                                 | Missing            | 640                  |       |         |
| Central Tendency and Dispersion | Mean               | 15.35                |       |         |
|                                 | Standard Deviation | 6.061                |       |         |
|                                 | Percentile 25      | 12.00                |       |         |
|                                 | Percentile 50      | 17.00                |       |         |
|                                 | Percentile 75      | 20.00                |       |         |
| Labeled Values                  | 0                  | IAP                  | 589   | 39.3%   |
|                                 | 1                  | UNDER \$1000         | 11    | 0.7%    |
|                                 | 2                  | \$1000 TO 2999       | 28    | 1.9%    |
|                                 | 3                  | \$3000 TO 3999       | 18    | 1.2%    |
|                                 | 4                  | \$4000 TO 4999       | 13    | 0.9%    |
|                                 | 5                  | \$5000 TO 5999       | 18    | 1.2%    |
|                                 | 6                  | \$6000 TO 6999       | 18    | 1.2%    |
|                                 | 7                  | \$7000 TO 7999       | 9     | 0.6%    |
|                                 | 8                  | \$8000 TO 9999       | 20    | 1.3%    |
|                                 | 9                  | \$10000 TO 12499     | 24    | 1.6%    |
|                                 | 10                 | \$12500 TO 14999     | 15    | 1.0%    |
|                                 | 11                 | \$15000 TO 17499     | 26    | 1.7%    |
|                                 | 12                 | \$17500 TO 19999     | 23    | 1.5%    |
|                                 | 13                 | \$20000 TO 22499     | 41    | 2.7%    |
|                                 | 14                 | \$22500 TO 24999     | 43    | 2.9%    |
|                                 | 15                 | \$25000 TO 29999     | 52    | 3.5%    |
|                                 | 16                 | \$30000 TO 34999     | 68    | 4.5%    |
|                                 | 17                 | \$35000 TO 39999     | 58    | 3.9%    |
|                                 | 18                 | \$40000 TO 49999     | 82    | 5.5%    |
|                                 | 19                 | \$50000 TO 59999     | 72    | 4.8%    |
|                                 | 20                 | \$60000 TO 74999     | 75    | 5.0%    |
|                                 | 21                 | \$75000 TO \$89999   | 46    | 3.1%    |
|                                 | 22                 | \$90000 TO \$109999  | 35    | 2.3%    |
|                                 | 23                 | \$110000 TO \$129999 | 17    | 1.1%    |
|                                 | 24                 | \$130000 TO \$149999 | 12    | 0.8%    |
|                                 | 25                 | \$150000 TO \$169999 | 6     | 0.4%    |
|                                 | 26                 | \$170000 OR OVER     | 30    | 2.0%    |
| 27                              | REFUSED            | 42                   | 2.8%  |         |
| 98                              | DK                 | 9                    | 0.6%  |         |
| 99                              | NA                 | 0                    | 0.0%  |         |



**SEX**

|                     |              | Value            | Count | Percent |
|---------------------|--------------|------------------|-------|---------|
| Standard Attributes | Position     | 42               |       |         |
|                     | Label        | Respondent's sex |       |         |
|                     | Type         | Numeric          |       |         |
|                     | Format       | F1               |       |         |
|                     | Measurement  | Nominal          |       |         |
|                     | Role         | Input            |       |         |
|                     | Valid Values | 1                | MALE  | 681     |
|                     | 2            | FEMALE           | 819   | 54.6%   |

**SEXEDUC**

|                     |              | Value                           | Count | Percent |
|---------------------|--------------|---------------------------------|-------|---------|
| Standard Attributes | Position     | 43                              |       |         |
|                     | Label        | Sex education in public schools |       |         |
|                     | Type         | Numeric                         |       |         |
|                     | Format       | F1                              |       |         |
|                     | Measurement  | Nominal                         |       |         |
|                     | Role         | Input                           |       |         |
|                     | Valid Values | 1                               | FAVOR | 909     |
|                     | 2            | OPPOSE                          | 72    | 4.8%    |
|                     | 3            | DEPENDS                         | 0     | 0.0%    |
| Missing Values      | 0            | IAP                             | 512   | 34.1%   |
|                     | 8            | DK                              | 7     | 0.5%    |
|                     | 9            | NA                              | 0     | 0.0%    |

**SEXFREQ**

|                     |             | Value                             | Count | Percent |
|---------------------|-------------|-----------------------------------|-------|---------|
| Standard Attributes | Position    | 44                                |       |         |
|                     | Label       | Frequency of sex during last year |       |         |
|                     | Type        | Numeric                           |       |         |
|                     | Format      | F1                                |       |         |
|                     | Measurement | Nominal                           |       |         |
|                     | Role        | Input                             |       |         |

*(Continued)*

(Continued)

|                |    | Value             | Count | Percent |
|----------------|----|-------------------|-------|---------|
| Valid Values   | 0  | NOT AT ALL        | 225   | 15.0%   |
|                | 1  | ONCE OR TWICE     | 85    | 5.7%    |
|                | 2  | ONCE A MONTH      | 113   | 7.5%    |
|                | 3  | 2-3 TIMES A MONTH | 159   | 10.6%   |
|                | 4  | WEEKLY            | 131   | 8.7%    |
|                | 5  | 2-3 PER WEEK      | 144   | 9.6%    |
| Missing Values | 6  | 4+ PER WEEK       | 48    | 3.2%    |
|                | -1 | IAP               | 567   | 37.8%   |
|                | 8  | DK                | 2     | 0.1%    |
|                | 9  | NA                | 26    | 1.7%    |

### TEENSEX

|                     |             | Value                            | Count | Percent |
|---------------------|-------------|----------------------------------|-------|---------|
| Standard Attributes | Position    | 45                               |       |         |
|                     | Label       | Sex before marriage: teens 14-16 |       |         |
|                     | Type        | Numeric                          |       |         |
|                     | Format      | F1                               |       |         |
|                     | Measurement | Nominal                          |       |         |
|                     | Role        | Input                            |       |         |
| Valid Values        | 1           | ALWAYS WRONG                     | 598   | 39.9%   |
|                     | 2           | ALMST ALWAYS WRG                 | 160   | 10.7%   |
|                     | 3           | SOMETIMES WRONG                  | 117   | 7.8%    |
|                     | 4           | NOT WRONG AT ALL                 | 103   | 6.9%    |
|                     | 5           | OTHER                            | 0     | 0.0%    |
| Missing Values      | 0           | IAP                              | 511   | 34.1%   |
|                     | 8           | DK                               | 9     | 0.6%    |
|                     | 9           | NA                               | 2     | 0.1%    |

## TVHOURS

|                                 |                    | Value                     | Count | Percent |
|---------------------------------|--------------------|---------------------------|-------|---------|
| Standard Attributes             | Position           | 46                        |       |         |
|                                 | Label              | Hours per day watching TV |       |         |
|                                 | Type               | Numeric                   |       |         |
|                                 | Format             | F2                        |       |         |
|                                 | Measurement        | Scale                     |       |         |
|                                 | Role               | Input                     |       |         |
| N                               | Valid              | 986                       |       |         |
|                                 | Missing            | 514                       |       |         |
|                                 |                    |                           |       |         |
| Central Tendency and Dispersion | Mean               | 2.98                      |       |         |
|                                 | Standard Deviation | 2.783                     |       |         |
|                                 | Percentile 25      | 1.00                      |       |         |
|                                 | Percentile 50      | 2.00                      |       |         |
|                                 | Percentile 75      | 4.00                      |       |         |
| Labeled Values                  | -1                 | IAP                       | 512   | 34.1%   |
|                                 | 98                 | DK                        | 2     | 0.1%    |
|                                 | 99                 | NA                        | 0     | 0.0%    |
